# Supplementary material for: Genome-Wide Association and Pathway Analysis of Carcass and Meat Quality Traits in Karachai Young Goats
Source: MDPI journal article supplement (doi:10.3390/ani13203237), 2023-10-17
Supplement: s1 [file s1]

Table S1. Body measurements in yang goats at four and eight months

| <b>"Darik"</b>      |       |          |        | <b>"Uchkulan"</b>    |       |          |        | <b>"Storozhevaya"</b> |       |          |        |
|---------------------|-------|----------|--------|----------------------|-------|----------|--------|-----------------------|-------|----------|--------|
| Four months         |       |          |        | Four months          |       |          |        | Four months           |       |          |        |
| Trait               | Mean  | Std. Dev | CV,%   | Trait                | Mean  | Std. Dev | CV,%   | Trait                 | Mean  | Std. Dev | CV,%   |
| BW, kg              | 24,17 | 3,19     | 17,01% | BW, kg               | 23    | 3,06     | 18,82% | BW, kg                | 22,79 | 3,41     | 11,42% |
| WH, cm              | 49,33 | 1,8      | 3,24%  | WH, cm               | 48,8  | 1,46     | 2,13%  | WH, cm                | 49,36 | 1,97     | 3,82%  |
| RH, cm              | 50,23 | 1,81     | 3,29%  | RH, cm               | 49,66 | 1,48     | 2,20%  | RH, cm                | 50,32 | 1,98     | 3,85%  |
| BL, cm              | 51,36 | 1,73     | 3,00%  | BL, cm               | 50,78 | 1,67     | 2,79%  | BL, cm                | 51,46 | 2,13     | 4,34%  |
| CP, cm              | 53,33 | 1,5      | 2,25%  | CP, cm               | 52,8  | 1,23     | 1,52%  | CP, cm                | 53,21 | 1,58     | 2,51%  |
| CW, cm              | 8,84  | 0,77     | 0,59%  | CW, cm               | 8,86  | 0,68     | 0,47%  | CW, cm                | 9     | 0,76     | 0,55%  |
| CD, cm              | 19,94 | 1,41     | 1,99%  | CD, cm               | 19,66 | 1,19     | 1,41%  | CD, cm                | 19,82 | 1,23     | 1,46%  |
| RW, cm              | 10,44 | 0,55     | 0,30%  | RW, cm               | 10,42 | 0,45     | 0,20%  | RW, cm                | 10,32 | 0,46     | 0,21%  |
| Eight months        |       |          |        | Eight months         |       |          |        | Eight months          |       |          |        |
| Trait               | Mean  | Std. Dev | CV,%   | Trait                | Mean  | Std. Dev | CV,%   | Trait                 | Mean  | Std. Dev | CV,%   |
| BW, kg              | 37,47 | 3,95     | 15,58% | BW, kg               | 36,38 | 4,1      | 16,84% | BW, kg                | 36,57 | 3,97     | 15,80% |
| WH, cm              | 55,08 | 2,74     | 7,50%  | WH, cm               | 52,94 | 2,44     | 5,96%  | WH, cm                | 53,32 | 2,56     | 6,56%  |
| RH, cm              | 55,9  | 2,58     | 6,67%  | RH, cm               | 53,58 | 2,5      | 6,26%  | RH, cm                | 53,96 | 2,87     | 8,21%  |
| BL, cm              | 56,84 | 2,56     | 6,56%  | BL, cm               | 54,1  | 2,42     | 5,83%  | BL, cm                | 54,79 | 3,04     | 9,22%  |
| CP, cm              | 62,21 | 2,82     | 7,98%  | CP, cm               | 61,06 | 2,81     | 7,88%  | CP, cm                | 61,75 | 3,41     | 11,60% |
| CW, cm              | 12,13 | 0,87     | 0,75%  | CW, cm               | 9,72  | 0,78     | 0,61%  | CW, cm                | 9,93  | 1,04     | 1,07%  |
| CD, cm              | 21,98 | 1,63     | 2,64%  | CD, cm               | 21,64 | 1,63     | 2,66%  | CD, cm                | 21,25 | 1,38     | 1,91%  |
| RW, cm              | 11,94 | 0,86     | 0,75%  | RW, cm               | 11,56 | 0,6      | 0,66%  | RW, cm                | 11,39 | 0,81     | 0,66%  |
| <b>"Kyzyl-Kala"</b> |       |          |        | <b>"Pyatigorsky"</b> |       |          |        | <b>"Maysky"</b>       |       |          |        |

| Four months  |       |          |        | Four months  |       |          |       | Four months  |       |          |        |
|--------------|-------|----------|--------|--------------|-------|----------|-------|--------------|-------|----------|--------|
| Trait        | Mean  | Std. Dev | CV,%   | Trait        | Mean  | Std. Dev | CV,%  | Trait        | Mean  | Std. Dev | CV,%   |
| BW, kg       | 23,12 | 2,61     | 6,82%  | BW, kg       | 24,37 | 2,98     | 9,89% | BW, kg       | 23,92 | 2,95     | 7,39%  |
| WH, cm       | 48,39 | 1,44     | 2,07%  | WH, cm       | 49,06 | 1,67     | 4,46% | WH, cm       | 49,15 | 2,03     | 3,76%  |
| RH, cm       | 49,22 | 1,53     | 2,34%  | RH, cm       | 50    | 1,73     | 7,08% | RH, cm       | 50    | 2,11     | 4,01%  |
| BL, cm       | 50,39 | 1,5      | 2,25%  | BL, cm       | 51,17 | 1,77     | 6,26% | BL, cm       | 51,15 | 2,11     | 4,00%  |
| CP, cm       | 52,95 | 1,61     | 2,58%  | CP, cm       | 53,24 | 1,43     | 6,58% | CP, cm       | 53,19 | 1,88     | 3,24%  |
| CW, cm       | 9,04  | 0,67     | 0,45%  | CW, cm       | 8,89  | 0,78     | 1,36% | CW, cm       | 9,08  | 0,8      | 0,65%  |
| CD, cm       | 19,63 | 1,17     | 1,37%  | CD, cm       | 19,72 | 1,24     | 2,30% | CD, cm       | 19,87 | 1,25     | 1,56%  |
| RW, cm       | 10,18 | 0,42     | 0,17%  | RW, cm       | 10,3  | 0,48     | 0,44% | RW, cm       | 10,26 | 0,41     | 0,19%  |
| Eight months |       |          |        | Eight months |       |          |       | Eight months |       |          |        |
| Trait        | Mean  | Std. Dev | CV,%   | Trait        | Mean  | Std. Dev | CV,%  | Trait        | Mean  | Std. Dev | CV,%   |
| BW, kg       | 35,08 | 3,65     | 13,29% | BW, kg       | 36,91 | 3,37     | 9,13% | BW, kg       | 36,1  | 3,86     | 13,52% |
| WH, cm       | 52,04 | 2,51     | 6,29%  | WH, cm       | 52,73 | 2,49     | 4,44% | WH, cm       | 52,37 | 3        | 8,98%  |
| RH, cm       | 52,65 | 2,8      | 7,84%  | RH, cm       | 53,42 | 3,03     | 4,96% | RH, cm       | 53,11 | 2,99     | 8,94%  |
| BL, cm       | 53,53 | 3,02     | 9,15%  | BL, cm       | 54,14 | 2,87     | 4,79% | BL, cm       | 53,58 | 3,03     | 9,09%  |
| CP, cm       | 60,14 | 3,92     | 15,40% | CP, cm       | 60,96 | 3,17     | 4,78% | CP, cm       | 59,93 | 3,2      | 9,88%  |
| CW, cm       | 10,15 | 1,13     | 1,27%  | CW, cm       | 9,87  | 1,3      | 0,79% | CW, cm       | 9,95  | 1,08     | 1,13%  |
| CD, cm       | 21,27 | 1,95     | 3,79%  | CD, cm       | 21,66 | 1,72     | 2,30% | CD, cm       | 21,42 | 1,67     | 2,79%  |
| RW, cm       | 11,16 | 0,84     | 0,70%  | RW, cm       | 11,19 | 0,73     | 0,32% | RW, cm       | 11,15 | 0,79     | 0,56%  |

Table S2 List of common SNPs associated with body conformation traits at both 4 and 8 months of age in Karachai goats.

|   | SNP                          | Position    |             | Trait                                          |
|---|------------------------------|-------------|-------------|------------------------------------------------|
|   |                              | AdaptMap    | ARS1.2      |                                                |
| 1 | snp29553-scaffold320-1261495 | 147 219 943 | 149 596 828 | BW4m, WH4m, CW8m                               |
|   | snp36273-scaffold435-778554  | 75 496 238  | 76 791 560  | BW8m, BL4m                                     |
|   | snp37579-scaffold46-3395473  | 149 924 303 | 152 300 137 | BW4m, CW8m                                     |
|   | snp48335-scaffold686-556322  | 46 866 236  | 47 955 872  | BW4m, RH8m                                     |
| 2 | snp3628-scaffold1113-460458  | 119 046 372 | 16 103 527  | BW4m, WH4m, WH8m, RH4m, RH8m, BL4m, BL8m       |
|   | snp45045-scaffold614-2989486 | 48 583 647  | 87 021 794  | BW4m, CW8m                                     |
|   | snp45128-scaffold614-6524265 | 52 118 426  | 83 474 726  | BL8m, RH8m, WH8m                               |
|   | snp45987-scaffold631-242453  | 94 055 097  | 41 146 618  | BW4m, CW8m                                     |
| 3 | snp15461-scaffold164-717536  | 44 049 812  | 74 329 119  | BW4m, WH4m, WH8m, BL8m, RH4m, RH8m, CW8m, CD4m |
| 4 | snp24555-scaffold2498-324452 | 15 657 299  | 103 535 122 | BW4m, WH8m,                                    |
|   | snp43974-scaffold595-3225253 | 92 070 125  | 25 235 510  | BW4m, BL8m                                     |
|   | snp6325-scaffold1223-530258  | 11 881 912  | 107 364 229 | BW4m, BW8m                                     |
| 5 | snp14251-scaffold157-188734  | 19 499 085  | 19 934 148  | BW4m, BW8m                                     |
|   | snp28866-scaffold310-6866081 | 68 925 209  | 69 743 011  | BW4m, WH8m, RH8m, BL8m                         |
|   | snp32947-scaffold383-159900  | 69 928 227  | 70 744 300  | BW4m, BW8m                                     |
|   | snp33373-scaffold392-511730  | 56 209 048  | 57 098 635  | BW4m, BW8m, CW8m                               |
|   | snp33417-scaffold392-2662378 | 54 058 400  | 54 952 435  | BW4m, BW8m                                     |
|   | snp33463-scaffold392-4664782 | 52 055 996  | 52 930 625  | BW4m, CW8m                                     |
| 6 | snp11972-scaffold1440-170733 | 109 087 772 | 112 296 759 | BW4m, WH8m, RH8m, BL8m, CP8m                   |
|   | snp2183-scaffold1066-1111590 | 73 165 497  | 75 620 791  | BW4m, CW8m                                     |

|    | SNP                           | Position   |            | Trait                                                      |
|----|-------------------------------|------------|------------|------------------------------------------------------------|
|    |                               | AdaptMap   | ARS1.2     |                                                            |
|    | snp40053-scaffold511-1070977  | 61 826 989 | 64 228 064 | BW4m, WH8m, CD8m                                           |
|    | snp40083-scaffold511-2344051  | 60 553 915 | 62 949 329 | BW4m, CW8m                                                 |
|    | snp945-scaffold1025-1329036   | 95 725 920 | 99 053 758 | BW4m, BW8m                                                 |
| 7  | snp30641-scaffold339-3412745  | 44 814 083 | 61 869 256 | BW4m, BW8m, WH8m, RH8m, BL8m, CP8m                         |
|    | snp4684-scaffold1152-350655   | 96 054 404 | 10 521 909 | RH8m, WH8m, BL8m, CP8m                                     |
|    | snp50055-scaffold716-3629742  | 76 765 612 | 29 871 014 | BW4m, WH4m, WH8m, RH4m, RH8m, BL4m, BL8m                   |
| 8  | snp12947-scaffold1499-2414292 | 66 113 241 | 67 503 568 | BL4m, BW8m                                                 |
| 9  | snp10101-scaffold1358-1351350 | 27 789 793 | 27 999 512 | BW4m, CW8m                                                 |
|    | snp29395-scaffold318-901939   | 52 868 428 | 53 346 107 | BW4m, RH8m                                                 |
|    | snp31974-scaffold359-260195   | 12 795 958 | 12 886 633 | BW4m, WH4m, WH8m, RH4m, RH8m, BL4m, BL8m                   |
|    | snp3575-scaffold1110-924176   | 58 547 070 | 59 047 836 | BW4m, CW8m                                                 |
|    | snp39588-scaffold504-358366   | 2 394 396  | 2 388 136  | WH8m, RH8m, BL8m                                           |
| 10 | snp40816-scaffold524-739363   | 25 782 240 | 25 989 680 | BW4m, CW8m                                                 |
|    | snp50508-scaffold725-933710   | 66 049 702 | 66 584 485 | BW4m, WH4m, WH8m, RH4m, RH8m, BL8m, CW8m, CD4m             |
| 11 | snp1481-scaffold104-2612843   | 71 882 233 | 27 289 223 | BW4m, WH8m                                                 |
|    | snp1502-scaffold104-3550558   | 70 944 518 | 28 278 268 | BW4m, BL8m                                                 |
|    | snp2144-scaffold1065-411721   | 74 906 896 | 24 296 772 | BW4m, BW8m                                                 |
|    | snp7931-scaffold1287-749597   | 69 635 073 | 29 620 817 | CD4m, WH8m, CW8m                                           |
|    | snp23209-scaffold2318-21647   | 41 071 978 | 41 908 344 | CD4m, CD8m, CP4m                                           |
| 12 | snp31438-scaffold348-1638233  | 76 566 792 | 77 996 024 | BW4m, WH4m, WH8m, RH4m, RH8m, BL4m, BL8m, CP8m, CD4m, RW4m |
|    | snp48699-scaffold691-2724642  | 57 786 919 | 59 166 263 | BW4m, BL8m, WH8m, RH8m, CW8m                               |

|    | SNP                          | Position   |            | Trait                                          |
|----|------------------------------|------------|------------|------------------------------------------------|
|    |                              | AdaptMap   | ARS1.2     |                                                |
| 13 | snp48703-scaffold691-2873716 | 57 637 845 | 59 016 707 | BW4m, CW8m                                     |
|    | snp59936-scaffold998-300033  | 50 269 992 | 42 374 922 | BW4m, CW8m                                     |
|    | snp17224-scaffold18-62949    | 24 094 863 | 24 898 037 | BW4m, CW8m                                     |
| 14 | snp3682-scaffold112-1043886  | 59 461 662 | 60 447 085 | BW4m, BW8m                                     |
|    | snp3684-scaffold112-1122107  | 59 539 883 | 60 525 389 | BW4, BW8m                                      |
|    | snp3953-scaffold1125-190766  | 39 246 435 | 40 120 683 | BW4m, WH8m, RH8m                               |
|    | snp8624-scaffold131-2001386  | 56 416 291 | 57 408 452 | BW4m, BW8m                                     |
| 15 | snp16280-scaffold1714-321063 | 43 968 904 | 26 782 979 | BW4m, BW8m                                     |
|    | snp35564-scaffold428-2794282 | 31 865 532 | 38 994 171 | CW8m, BW4m                                     |
| 16 | snp19484-scaffold1967-768885 | 47 641 690 | 49 693 270 | BW4m, BW8m                                     |
|    | snp41877-scaffold546-944746  | 9 951 450  | 11 898 552 | WH8m, RH8m, BL4m, BL8m, CP8m, CW8m, CD4m, CD8m |
| 17 | snp16745-scaffold1753-34329  | 66 174 065 | 66 737 512 | BW4m, BW8m                                     |
|    | snp52283-scaffold776-291202  | 36 434 931 | 36 698 503 | BW4m, WH8m, RH8m CW8m,                         |
| 18 | snp1555-scaffold1042-1068020 | 32 996 397 | 33 188 152 | BW4m, BW8m, CW8m                               |
|    | snp54586-scaffold833-2411812 | 41 158 871 | 41 365 838 | BW8m, BW4m                                     |
| 19 | snp47533-scaffold67-1525470  | 34 443 948 | 15 957 679 | CW8m, BW4m                                     |

Table S3 Closest candidate genes for genome-wide SNPs ( $p < 10^{-5}$ ) associated with body weight and body conformation traits based on GWAS in Karachai goats

| Chr | Position *  | SNP                          | Genes **                                                                                                                                                                                                                                                                                                                                                                                                                                                                                                                                                                                       |
|-----|-------------|------------------------------|------------------------------------------------------------------------------------------------------------------------------------------------------------------------------------------------------------------------------------------------------------------------------------------------------------------------------------------------------------------------------------------------------------------------------------------------------------------------------------------------------------------------------------------------------------------------------------------------|
| 1   | 149 596 828 | snp29553-scaffold320-1261495 | <i>DYRK1A</i> <sup>149441823..149586835</sup> ,<br><i>KCNJ6</i> <sup>149701472..149797540</sup>                                                                                                                                                                                                                                                                                                                                                                                                                                                                                                |
| 1   | 76 791 560  | snp36273-scaffold435-778554  | <i>CLDN16</i> <sup>76623425..76647770</sup> ,<br><i>CLDN1</i> <sup>76761492..76779219</sup> ,<br><i>P3H2</i> <sup>76910759..77089601</sup>                                                                                                                                                                                                                                                                                                                                                                                                                                                     |
| 1   | 152 300 137 | snp37579-scaffold46-3395473  | <i>EAFI</i> <sup>152290977..152305196</sup> ,<br><i>SH3BP5</i> <sup>152126639..152198013</sup> ,<br><i>CAPN7</i> <sup>152074727..152125699</sup> ,<br><i>METTL6</i> <sup>149899417..149915521</sup> ,<br><i>BTD</i> <sup>152470196..152530009</sup> ,<br><i>HACL1</i> <sup>152427023..152470636</sup> ,<br><i>COLQ</i> <sup>152314010..152379414</sup>                                                                                                                                                                                                                                         |
| 1   | 80 175 337  | snp40557-scaffold519-2601256 | <i>ST6GAL1</i> <sup>79880646..80020253</sup> ,<br><i>ADIPOQ</i> <sup>80092745..80105787</sup> ,<br><i>RFC4</i> <sup>80128438..80141956</sup> ,<br><i>EIF4A2</i> <sup>80141693..80148253</sup> ,<br><i>MIR1248</i> <sup>80144820..80144924</sup> ,<br><i>KNG1</i> <sup>80175447..80201003</sup> ,<br><i>TBCCD1</i> <sup>80319786..80347985</sup> ,<br><i>DNAJB11</i> <sup>80303639..80323058</sup> ,<br><i>CRYGS</i> <sup>80347993..80353625</sup> ,<br><i>FETUB</i> <sup>80226559..80241470</sup> ,<br><i>AHSG</i> <sup>80273479..80280715</sup> ,<br><i>HRG</i> <sup>80206861..80214843</sup> |
| 2   | 16 103 527  | snp3628-scaffold1113-460458  | <i>DIS3L2</i> <sup>15749236..16107599</sup> ,<br><i>NPPC</i> <sup>16144029..16148670</sup> ,<br><i>COPS7B</i> <sup>16210787..16236131</sup> ,<br><i>PDE6D</i> <sup>16236483..16290580</sup>                                                                                                                                                                                                                                                                                                                                                                                                    |
| 2   | 83 474 726  | snp45128-scaffold614-6524265 | <i>ARHGAP15</i> <sup>82654446..83365942</sup> ,<br><i>GTDC1</i> <sup>83524315..83969888</sup>                                                                                                                                                                                                                                                                                                                                                                                                                                                                                                  |

| Chr | Position *  | SNP                           | Genes **                                                                                                                                                                                                                                                                                                                                                                                                                                                                                                                                                                                                                                                                                                                      |
|-----|-------------|-------------------------------|-------------------------------------------------------------------------------------------------------------------------------------------------------------------------------------------------------------------------------------------------------------------------------------------------------------------------------------------------------------------------------------------------------------------------------------------------------------------------------------------------------------------------------------------------------------------------------------------------------------------------------------------------------------------------------------------------------------------------------|
| 2   | 41 146 618  | snp45987-scaffold631-242453   | <b>ADAM23</b> <sup>41016764..41207167</sup> ,<br><b>DYTN</b> <sup>40922895..40981626</sup> ,<br><b>ZDBF2</b> <sup>41304927..41315247</sup>                                                                                                                                                                                                                                                                                                                                                                                                                                                                                                                                                                                    |
| 3   | 74 329 119  | snp15461-scaffold164-717536   | <b>DPYD</b> <sup>74140748..75067664</sup>                                                                                                                                                                                                                                                                                                                                                                                                                                                                                                                                                                                                                                                                                     |
| 3   | 80 835 937  | snp22453-scaffold222-851829   | <b>RNPC3</b> <sup>80656949..80688529</sup>                                                                                                                                                                                                                                                                                                                                                                                                                                                                                                                                                                                                                                                                                    |
| 3   | 103 535 122 | snp24555-scaffold2498-324452  | <b>INTS3</b> <sup>103488703..103528260</sup> ,<br><b>SLC27A3</b> <sup>103529170..103534260</sup> ,<br><b>NPR1</b> <sup>103453176..103467036</sup> ,<br><b>CHTOP</b> <sup>103403168..103412805</sup> ,<br><b>ILF2</b> <sup>103435735..103442739</sup> ,<br><b>SNAPIN</b> <sup>103434079..103435783</sup> ,<br><b>NUP210L</b> <sup>103700807..103790482</sup> ,<br><b>DENND4B</b> <sup>103646814..103661156</sup> ,<br><b>RAB13</b> <sup>103691871..103699082</sup> ,<br><b>GATAD2B</b> <sup>103563417..103643132</sup> ,<br><b>CREB3L4</b> <sup>103679930..103685385</sup> ,<br><b>CRTC2</b> <sup>103662689..103672394</sup> ,<br><b>JTB</b> <sup>103685754..103688387</sup> ,<br><b>RPS27</b> <sup>103699112..103700692</sup> |
| 3   | 25 235 510  | snp43974-scaffold595-3225253  | <b>FAF1</b> <sup>24994347..25472808</sup>                                                                                                                                                                                                                                                                                                                                                                                                                                                                                                                                                                                                                                                                                     |
| 3   | 39 664 309  | snp48395-scaffold687-2186794  | <b>UBE2U</b> <sup>39591365..39669695</sup> ,<br><b>ROR1</b> <sup>39115242..39572757</sup>                                                                                                                                                                                                                                                                                                                                                                                                                                                                                                                                                                                                                                     |
| 3   | 107 364 229 | snp6325-scaffold1223-530258   | <b>FCRL3</b> <sup>107353691..107414661</sup> ,<br><b>FCRL5</b> <sup>107178895..107253732</sup> ,<br><b>FCRL4</b> <sup>107264514..107288861</sup> ,<br><b>FCRL1</b> <sup>107426215..107442566</sup> ,<br><b>CD5L</b> <sup>107533545..107548435</sup>                                                                                                                                                                                                                                                                                                                                                                                                                                                                           |
| 4   | 59 721 313  | snp15777-scaffold1654-1487108 | <b>AOAH</b> <sup>59458372..59656794</sup> ,<br><b>ELMO1</b> <sup>59752190..60332615</sup>                                                                                                                                                                                                                                                                                                                                                                                                                                                                                                                                                                                                                                     |
| 5   | 67 987 054  | snp28824-scaffold310-5114951  | <b>NUAK1</b> <sup>68166557..68240209</sup>                                                                                                                                                                                                                                                                                                                                                                                                                                                                                                                                                                                                                                                                                    |
| 5   | 69 743 011  | snp28866-scaffold310-6866081  | <b>BPIFC</b> <sup>69725751..69770627</sup> ,<br><b>ABTB3</b> <sup>69267173..69589324</sup>                                                                                                                                                                                                                                                                                                                                                                                                                                                                                                                                                                                                                                    |

| Chr | Position *  | SNP                          | Genes **                                                                                                                                                                                                                                                                                                                                                                                                                                                                                                                                        |
|-----|-------------|------------------------------|-------------------------------------------------------------------------------------------------------------------------------------------------------------------------------------------------------------------------------------------------------------------------------------------------------------------------------------------------------------------------------------------------------------------------------------------------------------------------------------------------------------------------------------------------|
|     |             |                              | <i>PRDM4</i> <sup>69650821..69675377</sup> ,<br><i>PWPI</i> <sup>69612078..69630949</sup> ,<br><i>SYN3</i> <sup>69807334..70282973</sup> ,<br><i>FBXO7</i> <sup>69782359..69802083</sup> ,<br><i>RTCB</i> <sup>69696203..69723193</sup> ,<br><i>ASCL4</i> <sup>69689101..69690926</sup>                                                                                                                                                                                                                                                         |
| 5   | 76 155 531  | snp32361-scaffold368-35564   | <i>BICD1</i> <sup>76054530..76298702</sup> ,<br><i>FGD4</i> <sup>75790760..76027336</sup>                                                                                                                                                                                                                                                                                                                                                                                                                                                       |
| 5   | 70 744 300  | snp32947-scaffold383-159900  | <i>LARGE1</i> <sup>70481063..71091017</sup>                                                                                                                                                                                                                                                                                                                                                                                                                                                                                                     |
| 5   | 57 098 635  | snp33373-scaffold392-511730  | <i>METTL7B</i> <sup>56935391..56937889</sup> ,<br><i>BLOC1S1</i> <sup>56901902..56905728</sup>                                                                                                                                                                                                                                                                                                                                                                                                                                                  |
| 5   | 54 952 435  | snp33417-scaffold392-2662378 | <i>CTDSP2</i> <sup>54975054..54998111</sup> ,<br><i>ATP23</i> <sup>54860513..54880033</sup> ,<br><i>METTL1</i> <sup>55035256..55039587</sup> ,<br><i>OS9</i> <sup>55087193..55122775</sup> ,<br><i>AGAP2</i> <sup>55063063..55080580</sup> ,<br><i>AVIL</i> <sup>54998163..55017814</sup> ,<br><i>TSFM</i> <sup>55018794..55026954</sup> ,<br><i>EEF1AKMT3</i> <sup>55027142..55034769</sup> ,<br><i>MARCHF9</i> <sup>55047130..55051800</sup> ,<br><i>CDK4</i> <sup>55055732..55058821</sup> ,<br><i>TSPAN31</i> <sup>55058825..55061830</sup> |
| 5   | 53 138 546  | snp33458-scaffold392-4457951 | <i>SLC16A7</i> <sup>52967562..53161674</sup>                                                                                                                                                                                                                                                                                                                                                                                                                                                                                                    |
| 5   | 52 930 625  | snp33463-scaffold392-4664782 | <i>SLC16A7</i> <sup>52967562..53161674</sup>                                                                                                                                                                                                                                                                                                                                                                                                                                                                                                    |
| 5   | 47 480 416  | snp37630-scaffold463-64670   | <i>MSRB3</i> <sup>47675346..47862677</sup> ,<br><i>HMGA2</i> <sup>47162168..47306445</sup>                                                                                                                                                                                                                                                                                                                                                                                                                                                      |
| 5   | 23 345 368  | snp38426-scaffold486-2412676 | <i>CRADD</i> <sup>23232979..23425649</sup>                                                                                                                                                                                                                                                                                                                                                                                                                                                                                                      |
| 5   | 8 501 612   | snp54059-scaffold822-1742056 | <i>SYT1</i> <sup>8236497..8861733</sup>                                                                                                                                                                                                                                                                                                                                                                                                                                                                                                         |
| 6   | 112 296 759 | snp11972-scaffold1440-170733 | <i>LDB2</i> <sup>111976958..112438346</sup>                                                                                                                                                                                                                                                                                                                                                                                                                                                                                                     |
| 7   | 61 869 256  | snp30641-scaffold339-3412745 | <i>SPOCK1</i> <sup>61566246..62155271</sup>                                                                                                                                                                                                                                                                                                                                                                                                                                                                                                     |
| 7   | 10 521 909  | snp4684-scaffold1152-350655  | <i>ST8SIA4</i> <sup>10496801..10602994</sup>                                                                                                                                                                                                                                                                                                                                                                                                                                                                                                    |



| Chr | Position * | SNP                           | Genes **                                                                                                                                                                                                                                                                                                                                  |
|-----|------------|-------------------------------|-------------------------------------------------------------------------------------------------------------------------------------------------------------------------------------------------------------------------------------------------------------------------------------------------------------------------------------------|
| 7   | 29 871 014 | snp50055-scaffold716-3629742  | <i>ANKRD34B</i> <sup>29871879..29887615</sup> ,<br><i>MSH3</i> <sup>29624244..29815981</sup> ,<br><i>DHFR</i> <sup>29816045..29831001</sup> ,<br><i>FAM151B</i> <sup>29900379..29933088</sup> ,<br><i>RARS1</i> <sup>30037187..30065836</sup>                                                                                             |
| 9   | 27 999 512 | snp10101-scaffold1358-1351350 | <i>ZBTB24</i> <sup>27989453..28000976</sup> ,<br><i>FIG4</i> <sup>27692407..27859852</sup> ,<br><i>PPIL6</i> <sup>28022791..28059970</sup> ,<br><i>AK9</i> <sup>27860458..27981818</sup> ,<br><i>MICAL1</i> <sup>28007621..28019243</sup> ,<br><i>CD164</i> <sup>28069710..28081880</sup> ,<br><i>SMPD2</i> <sup>28019378..28022352</sup> |
| 9   | 53 346 107 | snp29395-scaffold318-901939   | <i>PTPRK</i> <sup>53315015..53933095</sup> ,<br><i>THEMIS</i> <sup>53018391..53225409</sup>                                                                                                                                                                                                                                               |
| 9   | 12 886 633 | snp31974-scaffold359-260195   | <i>NCOA7</i> <sup>12608402..12765566</sup> ,<br><i>HEY2</i> <sup>12796333..12808691</sup>                                                                                                                                                                                                                                                 |
| 9   | 59 047 836 | snp3575-scaffold1110-924176   | <i>EYA4</i> <sup>58526657..58849760</sup> ,<br><i>TBPL1</i> <sup>59202000..59242065</sup> ,<br><i>TCF21</i> <sup>59157639..59160660</sup>                                                                                                                                                                                                 |
| 9   | 2 388 136  | snp39588-scaffold504-358366   | <i>FILIP1</i> <sup>2133407..2386513</sup> ,<br><i>SENP6</i> <sup>2454528..2585888</sup>                                                                                                                                                                                                                                                   |
| 9   | 25 989 680 | snp40816-scaffold524-739363   | <i>FYN</i> <sup>25894431..26111694</sup> ,<br><i>TRAF3IP2</i> <sup>26149367..26194655</sup>                                                                                                                                                                                                                                               |
| 9   | 66 584 485 | snp50508-scaffold725-933710   | <i>VTAI</i> <sup>66664723..66737542</sup> ,<br><i>NMBR</i> <sup>66613447..66622175</sup>                                                                                                                                                                                                                                                  |
| 10  | 25 854 668 | snp1448-scaffold104-1147808   | <i>MAX</i> <sup>25900233..25924465</sup> ,<br><i>RAB15</i> <sup>26026720..26050417</sup> ,<br><i>GPX2</i> <sup>26053403..26056892</sup>                                                                                                                                                                                                   |
| 10  | 27 289 223 | snp1481-scaffold104-2612843   | <i>PPP2R5E</i> <sup>27321023..27477743</sup> ,<br><i>DR89</i> <sup>27228084..27276570</sup> ,<br><i>SGPP1</i> <sup>72011216..72053701</sup>                                                                                                                                                                                               |

| Chr | Position * | SNP                          | Genes **                                                                                                                                                                                                                                                                                                                                                                                                                                                                                                                              |
|-----|------------|------------------------------|---------------------------------------------------------------------------------------------------------------------------------------------------------------------------------------------------------------------------------------------------------------------------------------------------------------------------------------------------------------------------------------------------------------------------------------------------------------------------------------------------------------------------------------|
| 10  | 66 185 170 | snp16064-scaffold1690-412631 | <b>RTF1</b> <sup>66154961..66200148</sup> ,<br><b>MGA</b> <sup>65893435..66043984</sup> ,<br><b>TYRO3</b> <sup>66086217..66103879</sup> ,<br><b>RPAP1</b> <sup>66111130..66127784</sup> ,<br><b>LTK</b> <sup>66129428..66137798</sup> ,<br><b>ITPKA</b> <sup>66138462..66146811</sup> ,<br><b>NDUFAF1</b> <sup>66227630..66247703</sup> ,<br><b>EXD1</b> <sup>66350192..66388591</sup> ,<br><b>CHP1</b> <sup>66313916..66349778</sup> ,<br><b>NUSAP1</b> <sup>66249743..66279326</sup> ,<br><b>OIP5</b> <sup>33155842..33167160</sup> |
| 10  | 24 296 772 | snp2144-scaffold1065-411721  | <b>GPHN</b> <sup>24055825..24607616</sup> ,                                                                                                                                                                                                                                                                                                                                                                                                                                                                                           |
| 10  | 90 722 528 | snp49271-scaffold703-2391474 | <b>HOMER1</b> <sup>90737422..90876268</sup> ,<br><b>JMY</b> <sup>90890185..90973599</sup> ,<br><b>CMYA5</b> <sup>90503815..90602388</sup> ,<br><b>TENT2</b> <sup>90604800..90668620</sup>                                                                                                                                                                                                                                                                                                                                             |
| 10  | 89 474 281 | snp49301-scaffold703-3633491 | <b>ANKDD1A</b> <sup>89383639..89425851</sup> ,<br><b>SPG21</b> <sup>89345119..89371062</sup> ,<br><b>PTGER2</b> <sup>89435648..89446090</sup> ,<br><b>MTFMT</b> <sup>89310760..89334973</sup> ,<br><b>RASL12</b> <sup>89261527..89277906</sup> ,<br><b>SLC51B</b> <sup>89277857..89288048</sup> ,<br><b>TXNDC16</b> <sup>89558229..89658168</sup> ,<br><b>GPR137C</b> <sup>89658741..89714098</sup>                                                                                                                                   |
| 10  | 29 620 817 | snp7931-scaffold1287-749597  | <b>PRKCH</b> <sup>29384010..29745599</sup> ,<br><b>TMEM30B</b> <sup>29784967..29788468</sup>                                                                                                                                                                                                                                                                                                                                                                                                                                          |
| 11  | 67 255 733 | snp17962-scaffold185-6628584 | <b>ANTXR1</b> <sup>67083768..67344176</sup> ,<br><b>GFPT1</b> <sup>67434693..67501259</sup>                                                                                                                                                                                                                                                                                                                                                                                                                                           |
| 11  | 77 656 443 | snp20768-scaffold204-3792524 | <b>APOB</b> <sup>77590208..77630122</sup> ,<br><b>TDRD15</b> <sup>77503856..77510131</sup> ,<br><b>LDAH</b> <sup>77798691..77896694</sup>                                                                                                                                                                                                                                                                                                                                                                                             |

| Chr | Position * | SNP                          | Genes **                                                                                                                                                                                                                                                                                                                                         |
|-----|------------|------------------------------|--------------------------------------------------------------------------------------------------------------------------------------------------------------------------------------------------------------------------------------------------------------------------------------------------------------------------------------------------|
| 12  | 9 948 039  | snp13622-scaffold1526-998265 | <b>TM9SF2</b> <sup>9916049..9966298</sup> ,<br><b>CLYBL</b> <sup>9645150..9878794</sup> ,<br><b>UBAC2</b> <sup>10054141..10225872</sup>                                                                                                                                                                                                          |
| 13  | 52 152 409 | snp13094-scaffold150-5171386 | <b>TGM3</b> <sup>52142060..52186060</sup> ,<br><b>STK35</b> <sup>52326090..52368178</sup> ,<br><b>TGM6</b> <sup>52042714..52078772</sup> ,<br><b>SNRPB</b> <sup>52011858..52020500</sup> ,<br><b>TMC2</b> <sup>51886958..51986741</sup>                                                                                                          |
| 13  | 41 908 344 | snp23209-scaffold2318-21647  | <b>SYNDIG1</b> <sup>41768426..41877740</sup> ,<br><b>ACSSI</b> <sup>41975280..42019317</sup> ,<br><b>APMAP</b> <sup>41943197..41969801</sup> ,<br><b>CST7</b> <sup>41932208..41942140</sup> ,<br><b>ENTPD6</b> <sup>42083119..42100859</sup> ,<br><b>VSX1</b> <sup>42035818..42044099</sup>                                                      |
| 13  | 77 996 024 | snp31438-scaffold348-1638233 | <b>PTPN1</b> <sup>78052477..78117075</sup> ,<br><b>RIPOR3</b> <sup>78118187..78191610</sup>                                                                                                                                                                                                                                                      |
| 13  | 18 377 009 | snp46284-scaffold638-1700219 | <b>PARD3</b> <sup>17803932..18377838</sup>                                                                                                                                                                                                                                                                                                       |
| 13  | 59 534 025 | snp48690-scaffold691-2355185 | <b>ANGPT4</b> <sup>59493311..59543214</sup> ,<br><b>RSPO4</b> <sup>59419545..59456637</sup> ,<br><b>FAM110A</b> <sup>59563554..59575513</sup> ,<br><b>SCRT2</b> <sup>59693358..59707360</sup> ,<br><b>SRXN1</b> <sup>59717581..59724941</sup>                                                                                                    |
| 13  | 59 166 263 | snp48699-scaffold691-2724642 | <b>RAD21L1</b> <sup>59165671..59201265</sup> ,<br><b>TMEM74B</b> <sup>59244717..59249746</sup> ,<br><b>PSMF1</b> <sup>59259919..59302429</sup> ,<br><b>SNPH</b> <sup>59109662..59153612</sup> ,<br><b>SDCBP2</b> <sup>59090093..59109110</sup> ,<br><b>FKBP1A</b> <sup>59038273..59061754</sup> ,<br><b>NSFLIC</b> <sup>59000052..59021299</sup> |
| 13  | 59 016 707 | snp48703-scaffold691-2873716 | <b>RAD21L1</b> <sup>59165671..59201265</sup> ,<br><b>TMEM74B</b> <sup>59244717..59249746</sup> ,<br><b>PSMF1</b> <sup>59259919..59302429</sup> ,                                                                                                                                                                                                 |

| Chr | Position * | SNP                          | Genes **                                                                                                                                                                                                                                                                                                                                                                                                                                      |
|-----|------------|------------------------------|-----------------------------------------------------------------------------------------------------------------------------------------------------------------------------------------------------------------------------------------------------------------------------------------------------------------------------------------------------------------------------------------------------------------------------------------------|
|     |            |                              | <i>SNPH</i> <sup>59109662..59153612</sup> ,<br><i>SDCBP2</i> <sup>59090093..59109110</sup> ,<br><i>FKBP1A</i> <sup>59038273..59061754</sup> ,<br><i>NSFL1C</i> <sup>59000052..59021299</sup> ,<br><i>CASS4</i> <sup>58791766..58829365</sup> ,<br><i>CSTF1</i> <sup>58833053..58845722</sup> ,<br><i>AURKA</i> <sup>58845806..58862526</sup> ,<br><i>FAM210B</i> <sup>58864336..58875132</sup> ,<br><i>MC3R</i> <sup>58935095..58936185</sup> |
| 15  | 47 831 648 | snp36734-scaffold445-2068057 | <i>SERGEF</i> <sup>47598321..47853505</sup> ,<br><i>SAAL1</i> <sup>47910630..47936036</sup> ,<br><i>TPH1</i> <sup>47860142..47897105</sup>                                                                                                                                                                                                                                                                                                    |
| 16  | 24 898 037 | snp17224-scaffold18-62949    | <i>BROX</i> <sup>24708745..24728139</sup> ,<br><i>AIDA</i> <sup>24660030..24708676</sup> ,<br><i>DISP1</i> <sup>24799660..25020285</sup>                                                                                                                                                                                                                                                                                                      |
| 16  | 26 376 843 | snp17258-scaffold18-1536295  | <i>CNIH3</i> <sup>26233683..26368158</sup>                                                                                                                                                                                                                                                                                                                                                                                                    |
| 16  | 50 997 497 | snp30143-scaffold331-984668  | <i>KAZN</i> <sup>50864778..51392076</sup> ,<br><i>TMEM51</i> <sup>50763811..50819829</sup>                                                                                                                                                                                                                                                                                                                                                    |
| 16  | 60 447 085 | snp3682-scaffold112-1043886  | <i>XPRI</i> <sup>60399354..60607780</sup> ,<br><i>KIAA1614</i> <sup>60625913..60669842</sup> ,<br><i>ACBD6</i> <sup>60059200..60264783</sup>                                                                                                                                                                                                                                                                                                  |
| 16  | 60 525 389 | snp3684-scaffold112-1122107  | <i>XPRI</i> <sup>60399354..60607780</sup> ,<br><i>KIAA1614</i> <sup>60625913..60669842</sup> ,<br><i>STX6</i> <sup>60683297..60727907</sup>                                                                                                                                                                                                                                                                                                   |
| 16  | 40 120 683 | snp3953-scaffold1125-190766  | <i>VPS13D</i> <sup>39694426..39961284</sup> ,<br><i>PLOD1</i> <sup>40203194..40232944</sup> ,<br><i>MFN2</i> <sup>40168595..40195881</sup> ,<br><i>MIIP</i> <sup>40142172..40156146</sup> ,<br><i>KIAA2013</i> <sup>40238540..40244293</sup> ,<br><i>NPPB</i> <sup>40311522..40312961</sup>                                                                                                                                                   |
| 16  | 56 893 479 | snp8636-scaffold131-2516395  | <i>ASTNI</i> <sup>56601271..56960443</sup> ,<br><i>BRINP2</i> <sup>56967843..57112277</sup>                                                                                                                                                                                                                                                                                                                                                   |

| Chr | Position * | SNP                          | Genes **                                                                                                                                                                                                                                                                                                                                                                                                                                                                                    |
|-----|------------|------------------------------|---------------------------------------------------------------------------------------------------------------------------------------------------------------------------------------------------------------------------------------------------------------------------------------------------------------------------------------------------------------------------------------------------------------------------------------------------------------------------------------------|
| 17  | 26 782 979 | snp16280-scaffold1714-321063 | <b>GOLGA3</b> <sup>26739013..26785475</sup> ,<br><b>BRS1</b> <sup>26509590..26593609</sup> ,<br><b>P2RX2</b> <sup>26626197..26629842</sup> ,<br><b>POLE</b> <sup>26631093..26687394</sup> ,<br><b>PXMP2</b> <sup>26687503..26697725</sup> ,<br><b>LRCOL1</b> <sup>26602142..26609535</sup> ,<br><b>PGAM5</b> <sup>26699796..26708294</sup> ,<br><b>ANKLE2</b> <sup>26708092..26732186</sup> ,<br><b>CHFR</b> <sup>26799009..26823758</sup> ,<br><b>MBD3L1</b> <sup>26881001..26881552</sup> |
| 17  | 3 009 675  | snp25671-scaffold264-3189431 | <b>TTC28</b> <sup>3122634..3697004</sup> ,<br><b>HSCB</b> <sup>3074644..3083643</sup> ,<br><b>CHEK2</b> <sup>3083718..3121516</sup> ,<br><b>CCDC11</b> <sup>73049418..3060253</sup> ,<br><b>XBP1</b> <sup>3041839..3046873</sup> ,<br><b>KREMEN1</b> <sup>2789473..2843831</sup>                                                                                                                                                                                                            |
| 18  | 49 693 270 | snp19484-scaffold1967-768885 | <b>SIRT</b> <sup>49484016..49503706</sup> ,<br><b>MRPS12</b> <sup>49529591..49531638</sup> ,<br><b>SARS2</b> <sup>49519987..49529496</sup> ,<br><b>CCER2</b> <sup>49514933..49517723</sup> ,<br><b>FBXO17</b> <sup>49533372..49565201</sup> ,<br><b>ACP7</b> <sup>49709295..49725396</sup> ,<br><b>PAK4</b> <sup>49768383..49785625</sup> ,<br><b>SYCN</b> <sup>49806056..49807510</sup> ,<br><b>NCCRP1</b> <sup>49800973..49804830</sup>                                                   |
| 18  | 11 898 552 | snp41877-scaffold546-944746  | <b>KCNG4</b> <sup>11894881..11909467</sup> ,<br><b>NECAB2</b> <sup>11690153..11731540</sup> ,<br><b>TAF1C</b> <sup>11868350..11877938</sup> ,<br><b>HSDL1</b> <sup>11832225..11846737</sup> ,<br><b>MBTPS1</b> <sup>11784809..11829970</sup> ,<br><b>DNAAF1</b> <sup>11846843..11868072</sup> ,<br><b>ADAD2</b> <sup>11879617..11886040</sup> ,                                                                                                                                             |

| Chr | Position * | SNP                          | Genes **                                                                                                                                                                                      |
|-----|------------|------------------------------|-----------------------------------------------------------------------------------------------------------------------------------------------------------------------------------------------|
|     |            |                              | <i>ATP2C2</i> <sup>12000229..12079250</sup> ,<br><i>WFDC1</i> <sup>11951833..11978108</sup> ,<br><i>MEAK7</i> <sup>12079026..12104623</sup>                                                   |
| 18  | 3 837 951  | snp6168-scaffold1217-1985930 | <i>BCAR1</i> <sup>3809751..3843150</sup> ,<br><i>LDHD</i> <sup>3694393..3698425</sup> ,<br><i>BCNT</i> <sup>3858817..3957257</sup> ,<br><i>P97BCNT</i> <sup>3965191..3984379</sup>            |
| 20  | 66 737 512 | snp16745-scaffold1753-34329  | <i>SRD5A1</i> <sup>66521371..66557879</sup> ,<br><i>NSUN2</i> <sup>66558291..66590095</sup> ,<br><i>UBE2QL1</i> <sup>66652430..66709023</sup> ,<br><i>MED10</i> <sup>66776806..66785320</sup> |
| 20  | 9 934 310  | snp17084-scaffold1785-86716  | <i>MCCC2</i> <sup>9930596..10011105</sup> ,<br><i>CARTPT</i> <sup>9879360..9881688</sup> ,<br><i>BDP1</i> <sup>10017212..10101724</sup>                                                       |
| 20  | 36 698 503 | snp52283-scaffold776-291202  | <i>WDR70</i> <sup>36678460..36951048</sup> ,<br><i>GDNF</i> <sup>36601218..36629923</sup>                                                                                                     |
| 20  | 7 640 897  | snp57358-scaffold913-963263  | <i>ARHGEF28</i> <sup>7708446..8053019</sup>                                                                                                                                                   |
| 21  | 15 802 894 | snp23789-scaffold240-161570  | <i>AKAP13</i> <sup>15509421..15831062</sup> ,<br><i>KLHL25</i> <sup>15858146..15908551</sup>                                                                                                  |
| 22  | 27 023 830 | snp8-scaffold1-286588        | <i>CNTN3</i> <sup>27061216..27354315</sup>                                                                                                                                                    |
| 24  | 33 188 152 | snp1555-scaffold1042-1068020 | <i>LAMA3</i> <sup>33026004..33281542</sup> ,<br><i>ANKRD29</i> <sup>33302633..33355333</sup> ,<br><i>NPC1</i> <sup>33374981..33418847</sup>                                                   |
| 24  | 41 365 838 | snp54586-scaffold833-2411812 | <i>PTPRM</i> <sup>40689884..41344869</sup> ,<br><i>RAB12</i> <sup>41427552..41449003</sup> ,<br><i>MTCL1</i> <sup>41484249..41596722</sup>                                                    |
| 26  | 2 502 077  | snp34795-scaffold413-993146  | <i>GLRX3</i> <sup>2612246..2644263</sup>                                                                                                                                                      |
| 26  | 29 391 796 | snp41114-scaffold532-1082302 | <i>BTRC</i> <sup>29360210..29542837</sup> ,<br><i>FBXW4</i> <sup>29220774..29308278</sup> ,<br><i>POLL</i> <sup>29331268..29339687</sup> ,<br><i>DPCD</i> <sup>29308767..29331223</sup>       |

| Chr | Position * | SNP                          | Genes **                                                                                                                                                                                                                                                                                                                                                                                           |
|-----|------------|------------------------------|----------------------------------------------------------------------------------------------------------------------------------------------------------------------------------------------------------------------------------------------------------------------------------------------------------------------------------------------------------------------------------------------------|
| 26  | 15 544 992 | snp47523-scaffold67-1110214  | <i>GFRA1</i> <sup>15295458..15530217</sup> ,<br><i>ATRNL1</i> <sup>15632606..16441513</sup>                                                                                                                                                                                                                                                                                                        |
| 26  | 15 957 679 | snp47533-scaffold67-1525470  | <b><i>ATRNL1</i></b> <sup>15632606..16441513</sup>                                                                                                                                                                                                                                                                                                                                                 |
| 26  | 16 947 347 | snp47556-scaffold67-2509157  | <b><i>ABLIM1</i></b> <sup>16745034..17079215</sup> ,<br><i>AFAP1L2</i> <sup>17113418..17229239</sup>                                                                                                                                                                                                                                                                                               |
| 26  | 26 021 230 | snp55577-scaffold861-1367391 | <b><i>SORCS3</i></b> <sup>25891651..26541837</sup>                                                                                                                                                                                                                                                                                                                                                 |
| 27  | 26 549 904 | snp26261-scaffold275-1733756 | <i>FRG1</i> <sup>26375919..26390204</sup> ,<br><i>ASAHI</i> <sup>26324136..26353014</sup>                                                                                                                                                                                                                                                                                                          |
| 29  | 22 176 436 | snp14507-scaffold1585-179608 | <i>ANO5</i> <sup>21904135..21999796</sup>                                                                                                                                                                                                                                                                                                                                                          |
| 29  | 16 138 152 | snp19092-scaffold192-2366    | <i>TENM4</i> <sup>16203644..16885831</sup>                                                                                                                                                                                                                                                                                                                                                         |
| 29  | 16 134 831 | snp32742-scaffold378-185653  | <i>TENM4</i> <sup>16203644..16885831</sup>                                                                                                                                                                                                                                                                                                                                                         |
| 29  | 17 317 479 | snp54961-scaffold840-1219604 | <b><i>USP35</i></b> <sup>17260319..17326282</sup> ,<br><i>GAB2</i> <sup>17081591..17259528</sup> ,<br><i>KCTD21</i> <sup>17326470..17341773</sup> ,<br><i>ALG8</i> <sup>17388598..17414771</sup> ,<br><i>KCTD14</i> <sup>17458319..17464560</sup> ,<br><i>INTS4</i> <sup>17478869..17592447</sup> ,<br><i>NDUFC2</i> <sup>17421065..17429291</sup> ,<br><i>THRSP</i> <sup>17430132..17435304</sup> |

\* Position of SNP is indicated according to ARS1.2 genome assembly; \*\* Bold type indicates genes within which the identified SNPs are localized

Table S4 Functional annotation of candidate genes

| Chr | Candidate genes                                | Gene function                                                                                                             |
|-----|------------------------------------------------|---------------------------------------------------------------------------------------------------------------------------|
| 1   | <i>HACL1</i> <sup>152427023..152470636</sup>   | fatty acid oxidation, the process of fatty acid metabolism                                                                |
|     | <i>KNG1</i> <sup>80175447..80201003</sup>      | blood clotting, negative regulation of blood clotting                                                                     |
|     | <i>FETUB</i> <sup>80226559..80241470</sup>     | sperm binding                                                                                                             |
|     | <i>AHSG</i> <sup>80273479..80280715</sup>      | ossification, negative regulation of bone mineralization, regulation of inflammatory response, regulation of phagocytosis |
|     | <i>HRG</i> <sup>80206861..80214843</sup>       | positive regulation of the immune response                                                                                |
| 2   | <i>NPPC</i> <sup>16144029..16148670</sup>      | body growth regulation                                                                                                    |
|     | <i>PDE6D</i> <sup>16236483..16290580</sup>     | visual perception, reaction to an irritant                                                                                |
|     | <i>ADAM23</i> <sup>41016764..41207167</sup>    | development of brain tissue, parathyroid gland, enrichment of immune cells                                                |
| 3   | <i>SLC27A3</i> <sup>103529170..103534260</sup> | transport of fatty acids                                                                                                  |
|     | <i>CREB3L4</i> <sup>103679930..103685385</sup> | spermatogenesis                                                                                                           |
|     | <i>CRTC2</i> <sup>103662689..103672394</sup>   | gluconeogenesis                                                                                                           |
|     | <i>ROR1</i> <sup>39115242..39572757</sup>      | sensory sound perception                                                                                                  |
| 4   | <i>AOAH</i> <sup>59458372..59656794</sup>      | the process of fatty acid metabolism, the process of lipopolysaccharide catabolism,                                       |
| 5   | <i>BICD1</i> <sup>76054530..76298702</sup>     | response to the viral process                                                                                             |
|     | <i>AGAP2</i> <sup>55063063..55080580</sup>     | development of breast alveoli                                                                                             |
|     | <i>MSRB3</i> <sup>47675346..47862677</sup>     | It may affect the shape and size of the ears in pigs and sheep, the connection with growth in cattle                      |
|     | <i>HMGA2</i> <sup>47162168..47306445</sup>     | the process of obesity induced by diet, the relationship with growth                                                      |
|     | <i>CRADD</i> <sup>23232979..23425649</sup>     | the "high-growing region" on chromosome 10 in mice is responsible for the growth and deposition of fat in pigs            |
| 9   | <i>FIG4</i> <sup>27692407..27859852</sup>      | the behavior of the musculoskeletal system, the development of neurons                                                    |
|     | <i>HEY2</i> <sup>12796333..12808691</sup>      | morphogenesis of the left and the right ventricle of the heart                                                            |
|     | <i>EYA4</i> <sup>58526657..58849760</sup>      | sensory sound perception                                                                                                  |



| Chr | Candidate genes                               | Gene function                                                                                                                                                                                                    |
|-----|-----------------------------------------------|------------------------------------------------------------------------------------------------------------------------------------------------------------------------------------------------------------------|
|     | <i>TCF21</i> <sup>59157639..59160660</sup>    | lungs morphogenesis; pulmonary vessels, bronchioles and diaphragm development                                                                                                                                    |
|     | <i>FYN</i> <sup>25894431..26111694</sup> ,    | forebrain development                                                                                                                                                                                            |
|     | <i>TRAF3IP2</i> <sup>26149367..26194655</sup> | heart development                                                                                                                                                                                                |
| 10  | <i>MAX</i> <sup>25900233..25924465</sup>      | positive transcription regulation from the promoter of RNA polymerase II                                                                                                                                         |
|     | <i>GPX2</i> <sup>26053403..26056892</sup>     | stress response                                                                                                                                                                                                  |
|     | <i>TYRO3</i> <sup>66086217..66103879</sup>    | development of sexual organs in males and females, innate immune response                                                                                                                                        |
|     | <i>HOMER1</i> <sup>90737422..90876268</sup>   | skeletal muscle contraction                                                                                                                                                                                      |
| 11  | <i>ANTXR1</i> <sup>67083768..67344176</sup>   | blood vessels development                                                                                                                                                                                        |
|     | <i>APOB</i> <sup>77590208..77630122</sup>     | intrauterine embryonic development, spermatogenesis, nervous system development, cholesterol metabolism, fertilization, postembryonic development                                                                |
| 13  | <i>TMC2</i> <sup>51886958..51986741</sup>     | mechanical stimulus detection is involved in the sensory perception of sound                                                                                                                                     |
|     | <i>APMAP</i> <sup>41943197..41969801</sup>    | процесс биосинтеза                                                                                                                                                                                               |
|     | <i>ANGPT4</i> <sup>59493311..59543214</sup>   | angiogenesis                                                                                                                                                                                                     |
| 15  | <i>TPH1</i> <sup>47860142..47897105</sup>     | the metabolic process of the amino acid family, the process of serotonin biosynthesis, positive regulation of fat cell differentiation, bone remodeling, development of breast alveoli, regulation of hemostasis |
| 16  | <i>XPR1</i> <sup>60399354..60607780</sup>     | virus response                                                                                                                                                                                                   |
|     | <i>PLOD1</i> <sup>40203194..40232944</sup>    | epidermis development                                                                                                                                                                                            |
| 17  | <i>GOLGA3</i> <sup>26739013..26785475</sup>   | spermatogenesis                                                                                                                                                                                                  |
| 18  | <i>P2RX2</i> <sup>26626197..26629842</sup>    | sensory sound perception                                                                                                                                                                                         |
|     | <i>LRCOL1</i> <sup>26602142..26609535</sup>   | digestion, lipid catabolism                                                                                                                                                                                      |
|     | <i>MBTPS1</i> <sup>11784809..11829970</sup>   | lipid metabolism process                                                                                                                                                                                         |
|     | <i>DNAAF1</i> <sup>11846843..11868072</sup>   | lung development, determination of left-right asymmetry of the pancreas, digestive tract and liver                                                                                                               |
|     | <i>ATP2C2</i> <sup>12000229..12079250</sup>   | breast epithelium development                                                                                                                                                                                    |
| 20  | <i>NSUN2</i> <sup>66558291..66590095</sup>    | spermatids development                                                                                                                                                                                           |

| Chr | Candidate genes                                    | Gene function                                   |
|-----|----------------------------------------------------|-------------------------------------------------|
| 20  | <i>CARTPT</i> <sup>9879360..9881688</sup>          | feeding behavior of adult animals               |
| 26  | <i>FBXW4</i> <sup>29220774..29308278</sup>         | cartilage development                           |
|     | <i>DPCD</i> <sup>29308767..29331223</sup>          | spermatogenesis                                 |
|     | <i>GFRA1</i> <sup>15295458..15530217</sup>         | nervous system development                      |
|     | <i>AFAP1L2</i> <sup>17113418..17229239</sup>       | response to the inflammatory process of tissues |
|     | <b><i>SORCS3</i></b> <sup>25891651..26541837</sup> | training, memory                                |
| 27  | <i>FRG1</i> <sup>26375919..26390204</sup>          | organ muscles development                       |
|     | <i>ASAH1</i> <sup>26324136..26353014</sup>         | fatty acid metabolism                           |
| 29  | <i>TENM4</i> <sup>16203644..16885831</sup>         | neurons development                             |

The genes localized within the SNP are highlighted in bold

**Table S5.** SNP candidates selected on the results of GWAS common for two or more signs of growth and development at the age of 4 and 8 months

| № | Chr | SNP position                               | Eight months |                 | Four months |                 |
|---|-----|--------------------------------------------|--------------|-----------------|-------------|-----------------|
|   |     |                                            | Trait        | P               | Trait       | P               |
| 1 | 3   | snp24555-scaffold2498-324452<br>15 657 299 | <b>WH8m</b>  | <b>2,93E-07</b> | WH4m        | 1,08E-05        |
|   |     |                                            | <b>RH8m</b>  | <b>2,36E-06</b> | RH4m        | 4,12E-05        |
|   |     |                                            | <b>BL8m</b>  | <b>4,80E-06</b> |             |                 |
|   |     |                                            | <b>CW8m</b>  | <b>9,93E-06</b> |             |                 |
|   |     |                                            |              |                 | CD4m        | 4,79E-05        |
| 2 | 5   | snp14251-scaffold157-188734<br>19 499 085  | BW8m         | 1,26E-05        | <b>BW4m</b> | <b>4,83E-07</b> |
|   |     |                                            | BL8m         | 4,88E-05        | BL4m        | 2,17E-05        |
|   |     |                                            | CP8m         | 2,80E-05        |             |                 |
|   |     |                                            |              |                 | WH4m        | 4,23E-05        |
|   |     |                                            |              |                 | RH4m        | 1,91E-05        |
| 3 | 5   | snp37630-scaffold463-64670<br>46 630 429   | BW8m         | 8,55E-05        | <b>BW4m</b> | <b>3,72E-06</b> |
| 4 | 5   | snp38426-scaffold486-2412676<br>22 879 856 | <b>BW8m</b>  | <b>4,83E-06</b> | <b>BW4m</b> | <b>1,50E-06</b> |
| 5 | 6   | snp40083-scaffold511-2344051<br>60 553 915 | <b>BW8m</b>  | <b>3,01E-06</b> | <b>BW4m</b> | <b>8,73E-07</b> |
|   |     |                                            |              |                 | RH4m        | 3,17E-05        |
|   |     |                                            |              |                 | WH4m        | 3,21E-05        |
|   |     |                                            |              |                 | BL4m        | 7,10E-05        |
| 6 | 10  | snp1448-scaffold104-1147808<br>73 347 268  | <b>BW8m</b>  | <b>4,56E-06</b> | BW4m        | 5,21E-05        |
| 7 | 10  | snp49271-scaffold703-2391474<br>10 276 674 | WH8m         | 2,01E-05        | WH4m        | 7,59E-05        |
|   |     |                                            | BL8m         | 4,05E-05        | BL4m        | 2,35E-05        |
|   |     |                                            | RH8m         | 7,83E-05        | RH4m        | 2,30E-05        |
|   |     |                                            |              |                 | <b>BW4m</b> | <b>4,14E-06</b> |
| 8 | 13  | snp31438-scaffold348-1638233<br>76 566 792 | <b>RH8m</b>  | <b>1,60E-07</b> | RH4m        | 2,52E-05        |
|   |     |                                            | <b>WH8m</b>  | <b>7,62E-07</b> | WH4m        | 1,59E-05        |
|   |     |                                            | <b>BL8m</b>  | <b>2,13E-06</b> | BL4m        | 2,02E-05        |
|   |     |                                            | CP8m         | 2,84E-05        |             |                 |
|   |     |                                            |              |                 | RW4m        | 3,96E-05        |

|    |    |                             |             |                 |             |                 |
|----|----|-----------------------------|-------------|-----------------|-------------|-----------------|
|    |    |                             |             |                 | BW4m        | 5,80E-05        |
|    |    |                             |             |                 | CD4m        | 6,29E-05        |
| 9  | 16 | snp8624-scaffold131-2001386 | <b>BW8m</b> | <b>8,21E-06</b> | <b>BW4m</b> | <b>5,51E-07</b> |
|    |    | 56 416 291                  |             |                 |             |                 |
| 10 | 18 | snp41877-scaffold546-944746 | <b>CD8m</b> | <b>1,45E-06</b> | <b>CD4m</b> | <b>4,06E-06</b> |
|    |    | 9 951 450                   | <b>BL8m</b> | <b>1,56E-06</b> | BL4m        | 8,18E-05        |
|    |    |                             | <b>WH8m</b> | <b>1,57E-06</b> |             |                 |
|    |    |                             | <b>RH8m</b> | <b>2,71E-06</b> |             |                 |
|    |    |                             | <b>CP8m</b> | <b>5,63E-06</b> |             |                 |

SNPs selected for the design of molecular genetic test systems are shown in gray fill; signs for which a genome-wide confidence level is established according to the results of GWAS are shown in bold: BW (body weight), WH (withers height), RH (rump height), BL (body length), CP (chest perimeter), CW (chest width), CD (chest depth), RW (rump width)





Table S7. SNP candidates associated with the live weight of Karachai goats were used to construct a molecular genetic test system

| SNP                          | Polymorphism                | Chr | Name Description                                                           |                                       | Localization in the reference sequence<br>NCBI: NC_030812.1 |
|------------------------------|-----------------------------|-----|----------------------------------------------------------------------------|---------------------------------------|-------------------------------------------------------------|
|                              |                             |     | Gene                                                                       | Protein                               |                                                             |
| snp38426-scaffold486-2412676 | A23345368G, rs268270492 G/A | 5   | <i>CRADD</i> - CASP2 and RIPK1 domain containing adaptor with death domain | death domain-containing protein CRADD | 23,232,979 ...<br>23,425,649                                |
| snp37630-scaffold463-64670   | T47480416C, rs268269710 A/G | 5   | <i>HMGA2</i> - high-mobility group AT-hook 2                               | high mobility group protein HMGI-C    | 47,162,168 ...<br>47,306,445                                |
|                              |                             |     | <i>MSRB3</i> - methionine sulfoxide reductase B3                           | methionine sulfoxide reductase B3     | 47,675,346 ...<br>47,862,677                                |
| snp1448-scaffold104-1147808  | A25854668G, rs268234545 A/G | 10  | <i>FUT8</i> - fucosyltransferase 8                                         | fucosyltransferase 8                  | 25,310,706 ...<br>25,629,694                                |
|                              |                             |     | <i>MAX</i> - MYC associated factor X                                       | MAX protein                           | 25,900,233 ...<br>25,924,465                                |
|                              |                             |     | <i>RAB15</i> – Ras-Related Protein Rab-15                                  | Ras-Related Protein Rab-15            | 26,026,720 ...<br>26,050,417                                |
|                              |                             |     |                                                                            |                                       |                                                             |

Table S8 SNP candidates analysis for the molecular genetic test systems design

|                                                                                                              |                                                                                               |
|--------------------------------------------------------------------------------------------------------------|-----------------------------------------------------------------------------------------------|
| Chromosome: 5<br>Reference sequence NCBI: NC_030812.1<br>Polymorphism: A23345368G (ARS1.2), rs268270492 G/A  |                                                                                               |
| 23344921                                                                                                     | TCCCACCTCAACTACTTGGCTTCTCTCTTCTCTATCAAAGAGAGTGATCTTTAGACTGGAATGTGTAACATAAACATGGTTAAGAATAAA    |
| 23345011                                                                                                     | TTGAAGCACAGAGGATCAGTGATGATAATAATAGCTGCAACTATAATTTTTGAGATCTACTCAGGACCAAGTATTAGGAAAGATAAATTT    |
| 23345101                                                                                                     | AGTTCCTGGTTTTTTTTTTTTTTTCCCCAAATCTTATGGCAGCTTTTGCAATAGTAGAGATTATTGTCAACCGAACCCATTTTACAGGTGAGA |
| 23345191                                                                                                     | ACACCAAGGCTCAGGAAGACTTAGTAACAGGCCTGAAGTTATACATCCAGTAAGTGATGGGCTGAGATTAGATCCAGGCCTGACTGTTT     |
| 23345281                                                                                                     | TGCCTGGACACCCCTGCTGCCCATGCCTTTTACGCCCTAGCTGTTTTAAATCAGATTGTGTCTTTTACGCTTAAGCTATGTTCTGAGACGCA  |
| 23345371                                                                                                     | TAAATGGACAAAAAATCTGATAGGTGTTATTGAAAAATCCATAGTGTGTAATTGCAGGGGAAACAAAAATGGAATATCAAAAATAATGAAAA  |
| 23345461                                                                                                     | ACAAAGCCTGTTTTAATTTCTTTTAAAGGTTTTCAGTTTACAGTACCTCAGGCAGTCAGACGGTGATCCTCAGGACACTTGAGATTTTGT    |
| 23345551                                                                                                     | TCTGCAAGTAAATGGGTGTAAATGAAAGAAAGGATCCTTCGGGCAGCAAAGGTTTACAAAGCATCAGAAATTAGACACCCCAACTCCCT     |
| 23345641                                                                                                     | CCCTTCTTAATTATATAACTGGTAACCCATCTTTTGCAGAGAATCCTATATGGCTCATAAACAAGTTAAATTAATCTAGGCTCAATTG      |
| 23345731                                                                                                     | AGTAGATTTCATATTTCTTTGAACTCCTTTACACAAATTATCGACTTTAGACAAATAGGCTTTGTTGTGCTATTTCAGCCGCCAAGTCCCTG  |
| Chromosome: 5<br>Reference sequence NCBI: NC_030812.1<br>Polymorphism: T47480416C (ARS1.2), rs268269710 A/G  |                                                                                               |
| 47479971                                                                                                     | CCGGAAGAGCACCTGTGTGACCCAGGAGGCCTGTCTCCAGGTGCTCAACCACAGGTGGACTCCTCCCGCCCACAGGGGGCCCTGCCACTC    |
| 47480061                                                                                                     | TGGTACTCCTCCTGGGAGTGGAGACATGGAGACCACTACAAGTGCTACTGAGCCCTTTGAAAAGTGTGCAGTGTAGTGAAGAGTCAGGT     |
| 47480151                                                                                                     | GGGGCTTGGACTGGAATCCTGCTTGCCCTATGAACCTACCTTATAACACCATACTGAACTTCAGTTTCTCCATCTGTCAAATGGAAATTCCT  |
| 47480241                                                                                                     | CTCATGTTAGGATAGACAAATGAATTAATGCATATAAAGTGCTTACTTAGCCTATAGCAAGCACTCAATGAAAATTTCCGGCTAGTATGAT   |
| 47480331                                                                                                     | AACATTAACGTAATTTTCATTGTATTTAGCATTTTGTCTTGAGGTTTGAGGCCTTAGAAAAATATTGTTTTTATCCTACAGAGTACATGAC   |
| 47480421                                                                                                     | TAAGAGGAAAAACAGGAAATATGACTTACTCTATCCGTTAAACAAGGATTTTTTTTTTAAAGTGCTGACTTCATTGCTAAGTACTGTATCAG  |
| 47480511                                                                                                     | ATCCCTCCCTTCCTTCATTCTTCTACATTTACTGTGTGCTTTTGAGGTGCTAGGCATTGCATTAGATTCTAGTAAAAATAGCAATGAGACG   |
| 47480601                                                                                                     | GGCAGATAGATTTCTTCTGTCTCAGAGAATTTATGATTTCATGGGGGAAAGACACATATTACACAGTACACCAAGGTATAGAACCAGGTGTA  |
| 47480691                                                                                                     | AGTTATAGGCTCTACTGTAGTGTTCATGGAATATGGGGATCTAATAGGGTTTGCAAGATCAACAAGACCATCTAAATTTCCATTTTGTG     |
| 47480781                                                                                                     | AGACCAGTTCTCAAAAGAGTCGCAAGAGTCACACACGACAGAGCAACTGAACAAAAACAACTCGAAAGAGTAAGTGACTTGATTTCCAA     |
| Chromosome: 10<br>Reference sequence NCBI: NC_030817.1<br>Polymorphism: A25854668G (ARS1.2), rs268234545 A/G |                                                                                               |
| 25854221                                                                                                     | GCTCCACTGTGACAGCAGCAGACGATTTGATTTCCCTATTTCTTGTCTTTCTTTCTTATACCAAATTTTCTCTGCCTCCCTCCAAGATGG    |
| 25854311                                                                                                     | GATCTGCAAGGCCTGGGGACCTTATTAATTCACAAGGAAGGCCAACAGAAAGCAGGAAGAGCACTGACCAGCATGGCCCAAGTGGCCCCATC  |
| 25854401                                                                                                     | CTGTTCCCTGACTGTACTTGGGCTATAAGCCTTCTGCTCCTCCACAGAGTGTGTCATGGAAGGTGTGGAGAGGCCACGACACAGTCCACA    |
| 25854491                                                                                                     | TCTCAGGACATAGCCAATGGTGTGAGGAAATGGACTAAGTGTAGCCAGCTTGAGGCCAACATTTAGCTCAGTTTTCACAAGGTACACCTA    |
| 25854581                                                                                                     | ATCTTTAAATTGGAGAGGATGGCAGGTGCTTGAGCTACCCAGGTGTGATCCTCGCTCCACGGCATGAGCTCAGAGGTGCTGCAAAACATG    |
| 25854671                                                                                                     | GCTCTCAAATCTCCCTTCTACACCCCTGTCCCAACACCTGACATCTAGACCAAGAAGGTCATTCTTGTAGTCAAAACAGGTATTATTGCAA   |
| 25854761                                                                                                     | GTGCCAACTCCAAGTTGTTGACGTTAGATTTTGTTCAGAAAAGATTCTCAGGCCTTTTCTGGTCTCAGGGGGATATTTGCAATCAATTAG    |
| 25854851                                                                                                     | CAGTGTCTGCAATGGACACTGGAAAAGAAGTGCCAATGGTTTTGTACAGAATTACTGTCTTAAAAAACACTTTCTTTTATATTTACAG      |
| 25854941                                                                                                     | TGCAGCAGTGCAACTATACGGCCAGTAGAGAACGATGAACCTTGTAATGACCAATAACCATATCAGGGCCCTTACAGAGCATAGGAGGCAGA  |
| 25855031                                                                                                     | ACAGGGACTTTCTTTATTACTGTTATTATCATTCAAACCTTTTATTTTACGTTGGAATATAGCTGATTAAACAACGTTGTGATAGTTTCAGG  |



Table S9 Modeling the definition of polymorphism in position: a) rs268270492; b) rs268234545; c)rs268269710

|             |                                                                                                                                                                                    |
|-------------|------------------------------------------------------------------------------------------------------------------------------------------------------------------------------------|
| NC_030812.1 |                                                                                                                                                                                    |
| 23345518    | TGACTGCCTGAGGTAGTCTAAACTGAACCTTTAAAAAGGAAATTAAAACAGGCTTTGT                                                                                                                         |
| 23345460    | TTTTCATTATTTTGATATTCCATTTTGTGTTCCCCTGCAATTACACACTATGGATTTT                                                                                                                         |
|             | rs268270492-TM-A-Cy5<br>Cy5-TATGTGTCTCAGAACATAGCTTAA-BHQ-2<br>rs268270492-TM-G-TAMRA<br>TAMRA-TATGCGTCTCAGAACATAGCTTAA-BHQ-2<br>rs268270492-TM-F-><br>ATAACACCTATCAGATTTTTTGTCCATT |
| 23345402    | CAATAACACCTATCAGATTTTTTGTCCATTATGC (T) GTCTCAGAACATAGCTTAAAG                                                                                                                       |
| 23345347    | CTGAAAGACACAATCTGATTTAAAACAGCTAGGGGCTGAAAGGCATGGGCAGCAGGGT<br><-rs268270492-TM-R<br>TGTTTTAAATCAGATTGTGTCTTTTCAG                                                                   |
| 23345289    | GTCCAGGCAAAACAGTCAGGCCTGGATCTGAATCTCAGCCCATCACTTACTGGATGTA                                                                                                                         |
| 23345231    | TAACTTCAGGCCTGTTACTAAGTCTTCCTGAGCCTTGGTGTTCACCTGTAAAATGG                                                                                                                           |

a)

|             |                                                                                                                                                               |
|-------------|---------------------------------------------------------------------------------------------------------------------------------------------------------------|
| NC_030817.1 |                                                                                                                                                               |
| 25854833    | TCCCCCTGAGACCAGAAAAGGCCTGAGAATCTTTCTGAAACAAAATCTAACGTCAACAACTTGG                                                                                              |
| 25854769    | AGTTGGCACTTGCAATAATACCTGTTTGACTCAAGGAATGACCTTCTTGGTCTAGATGTCAGGT                                                                                              |
|             | rs268234545-TM-G-R6G<br>R6G-CCACGGTTTGAGCACCTC-BHQ-1<br>rs268234545-TM-A-FAM<br>FAM-CCATGGTTTGAGCACCTC-BHQ-1<br>rs268234545-TM-F-><br>GGTGTAGAAGGGAGATTTGAGAG |
| 25854705    | GTTGGGACAGGGGTGTAGAAGGGAGATTTGAGAGCCAT (C) GGTTTGAGCACCTCTGAGCTCA                                                                                             |
| 25854644    | TGCCGTGGAGCGAGGATCACACCTGGGTAGCTCAAGCACCTGCCATCCTCTCCAATTTAAAGAT<br><-rs268234545-TM-R<br>CAGGTGTGATCCTCGCTCCA                                                |

|          |                                                                    |
|----------|--------------------------------------------------------------------|
| 25854580 | TAGGTGACCTTGTGAAAACCTGAGCTAAAATGTTGGCCTCAAGCTGGCTACACTTAGTCCATTTC  |
| 25854516 | CTGACACCATTGGCTATGTCCTGAGATGTGGACTGTGTCTGTCGGCCTCTCCACACCTTCCATGCA |

b)

|             |                                                                                                                            |
|-------------|----------------------------------------------------------------------------------------------------------------------------|
| NC_030812.1 |                                                                                                                            |
| 47480580    | AGAATCTAATGCAATGCCTAGCACCTCAAAGACACACAGTAAATGTAGAAGAATGAAGGAAGGG                                                           |
| 47480516    | AGGGATCTGATACAGTACTTAGCAATGAAGTCAGCACTTTAAAAAAAATCCTTGTTTAACGGA                                                            |
|             | rs268269710-TM-A-FAM<br>FAM-TCATGTACTCTGTAGGATAAAAAAC-BHQ-1<br>rs268269710-TM-G-R6G<br>R6G-TCACGTACTCTGTAGGATAAAAAAC-BHQ-1 |
|             | rs268269710-TM-F-><br>GTCATATTTCTGTGTTTTCTCTTAG                                                                            |
| 47480452    | TAGAGTAAGTCATATTTCTGTGTTTTCTCTTAGTCAT (C) GTACTCTGTAGGATAAAAAACAATA                                                        |
| 47480391    | TTTTCTAAGGCCTCAAACCTCAAGACAAATGCTAAATACAATGAAAATTACGTTAATGTTATC                                                            |
|             | <-rs268269710-TM-R<br>TCTTGAGGGTTTGAGGCCTTAGA                                                                              |
| 47480327    | ATACTAGCCGAAATTTTCATTGAGTGCTTGCTATAGGCTAAGTAAGCACTTTATATGCATTAAT                                                           |
| 47480263    | TCATTTGTCTATCCTAACATGAGAGAATTTCCATTTGACAGATGGAGAACTGAAGTTCAGTAT                                                            |

c)

Table S10. Primers and fluorescent probes developed for genotyping polymorphism in loci rs268270492, rs268234545, rs268269710

| Primers                                                     | Fluorescent probes                                                   |
|-------------------------------------------------------------|----------------------------------------------------------------------|
| rs268270492                                                 |                                                                      |
| rs268270492-TM-F (ATA ACA CCT ATC AGA TTT<br>TTT GTC CAT T) | rs268270492-TM-G-TAMRA<br>(TAMRA-TAT GCG TCT CAGAACATAGCTTAA-BHQ-2)  |
| rs268270492-TM-R (TGT TTT AAA TCA GAT TGT<br>GTC TTT CAG)   | rs268270492-TM-A-Cy5 (Cy5-TAT GTG TCT CAG AAC ATA<br>GCT TAA-BHQ-2)  |
| rs268234545                                                 |                                                                      |
| rs268234545-TM-F (GGT GTA GAA GGG AGA TTT<br>GAG AG)        | rs268234545-TM-A-FAM (FAM-CCA TGG TTT GCA GCA<br>CCT C-BHQ-1)        |
| rs268234545-TM-R (CAG GTG TGA TCC TCG CTC<br>CA)            | rs268234545-TM-G-R6G (R6G-CCA CGG TTT GCA GCA<br>CCT C-BHQ-1)        |
| rs268269710                                                 |                                                                      |
| rs268269710-TM-F (GTC ATA TTT CCT GTT TTC CTC<br>TTA G)     | rs268269710-TM-A-FAM (FAM-TC ATG TAC TCT GTA<br>GGA TAA AAA C-BHQ-1) |
| rs268269710-TM-R (TCT TGA GGG TTT GAG GCC<br>TTA GA)        | rs268269710-TM-G-R6G (R6G-TC ACG TAC TCT GTA GGA<br>TAA AAA C-BHQ-1) |

**Table S11.** Indicators of meat productivity of young Karachai goats of different genotypes by SNP rs268269710, rs268270492, rs268234545 (8 months)

| Indicator                                                           | Polymorphism/Genotype |             |              |             |             |             |             |             |             |
|---------------------------------------------------------------------|-----------------------|-------------|--------------|-------------|-------------|-------------|-------------|-------------|-------------|
|                                                                     | rs268269710           |             |              | rs268270492 |             |             | rs268234545 |             |             |
|                                                                     | TT                    | TC          | CC           | AA          | AG          | GG          | AA          | AG          | GG          |
| <b>Slaughter indicators, morphological composition of carcasses</b> |                       |             |              |             |             |             |             |             |             |
| Pre-slaughter weight, kg                                            | 32,81±0,59            | 34,16±0,37  | 35,73±0,42*  | 34,64±0,33  | 31,22±0,54  | 36,15±0,48* | 34,92±0,37  | 34,83±0,21  | 33,82±0,46  |
| Weight of the fresh carcass, kg                                     | 14,24±0,38            | 15,12±0,24  | 16,07±0,29   | 15,88±0,21  | 12,65±0,32  | 15,86±0,29  | 15,85±0,22  | 15,02±0,14  | 14,42±0,27  |
| Internal fat weight, kg                                             | 0,96 ±0,06            | 1,12±0,12   | 1,20±0,17    | 1,00±0,04   | 0,89±0,06   | 1,17±0,09   | 1,15±0,10   | 1,10±0,04   | 1,00±0,07   |
| Slaughter weight, kg                                                | 15,20±0,32            | 16,24±0,19  | 17,27±0,24*  | 16,88±0,12  | 13,54±0,24  | 17,03±0,12* | 17,00±0,20  | 16,12±0,10  | 15,42±0,18  |
| Slaughter yield, %                                                  | 46,32±0,44            | 47,54±0,22  | 48,33±0,32*  | 48,73±0,28  | 43,37±0,32  | 47,11±0,44* | 48,86±0,25  | 46,28±0,12  | 45,59±0,21  |
| Boneless meat weight, kg                                            | 10,38±0,13            | 11,28±0,06  | 12,46±0,10** | 12,22±0,05  | 10,32±0,10  | 12,21±0,08* | 12,04±0,06  | 11,96±0,03  | 11,42±0,09  |
| Bone and tendon weight, kg                                          | 3,32±0,16             | 3,64±0,07   | 3,70±0,09    | 3,61±0,08   | 3,35±0,05   | 3,59±0,04   | 3,45±0,06   | 3,49±0,04   | 3,37±0,04   |
| The ratio of boneless meat to bones and tendons                     | 3,13±0,12             | 3,10±0,07   | 3,37±0,10    | 3,38±0,06   | 3,08±0,09   | 3,40±0,11   | 3,49±0,11   | 3,42±0,08   | 3,39±0,09   |
| Loin eye area, cm <sup>2</sup>                                      | 12,44±0,17            | 12,46±0,09  | 13,09±0,14*  | 13,01±0,04  | 11,47±0,10  | 13,21±0,12* | 12,26±0,12  | 12,08±0,06  | 11,95±0,10  |
| <b>The content of minced meat in an average sample, %</b>           |                       |             |              |             |             |             |             |             |             |
| Moisture                                                            | 69,40±0,68            | 68,55±0,72  | 67,20±0,67   | 69,14±0,59  | 69,21±0,72  | 66,90±0,41  | 68,72±0,68  | 68,25±0,72  | 69,05±0,67  |
| Fat                                                                 | 8,75±0,21             | 9,23±0,26   | 9,12±0,18    | 8,65±0,19   | 8,41±0,26   | 9,62±0,18   | 9,10±0,17   | 8,88±0,26   | 8,06±0,18   |
| Ash                                                                 | 1,0±0,04              | 1,0±0,05    | 1,1±0,07     | 1,0±0,05    | 1,0±0,05    | 1,1±0,06    | 1,0±0,05    | 1,0±0,06    | 1,0±0,05    |
| Protein                                                             | 20,90±0,21            | 21,20±0,34  | 22,56±0,17   | 21,21±0,27  | 22,34±0,43  | 22,48±0,52  | 21,16±0,23  | 21,87±0,43  | 21,87±0,27  |
| Caloric content, kcal/100 g                                         | 167,06±0,39           | 172,94±0,47 | 177,38±0,55  | 167,40±0,40 | 170,01±0,34 | 181,63±0,63 | 171,47±0,39 | 172,24±0,47 | 164,71±0,32 |

Significance levels: \* -  $p < 0.05$ ; \*\* -  $p < 0.01$
